# Supplementary material for: Short branch attraction in phylogenomic inference under the multispecies coalescent
Source: PubMed Central journal article supplement (PMC11372852; doi:10.3389/fevo.2023.1134764), 2023-06-28
Supplement: NIHMS2011024-supplement-Short_Branch_Supp.pdf [file NIHMS2011024-supplement-Short_Branch_Supp.pdf]

# Short Branch Attraction in Phylogenomic Inference Under the Multispecies Coalescent

## Appendix

Consider a bifurcating 4-taxon tree with branch lengths  $t_0, t_1, t_2, t_3, t_4$  where  $t_0$  is the length of the internal branch and  $t_i$ 's for  $i > 0$  are the lengths of four terminal branches. Let  $x_{n_1}$  and  $x_{n_2}$  be the nucleotides at two internal nodes. Under the Jukes-Cantor model, the probability  $P_{XY}(t) =$

$$\begin{cases} \frac{1}{4} + \frac{3}{4}e^{-\frac{4t}{3}} & \text{if } X = Y \\ \frac{1}{4} - \frac{1}{4}e^{-\frac{4t}{3}} & \text{if } X \neq Y \end{cases}. \text{ To simplify the notation, we use } p_1^i \text{ to denote the probability } P_{XY}(t_i) \text{ for}$$

$X = Y$  and we use  $p_2^i$  to denote the probability  $P_{XY}(t_i)$  for  $X \neq Y$ . Here, we assume  $0 \leq t_1 \leq t_2 \leq t_3 \leq t_4 < \infty$ . Furthermore, it can be shown that

1.  $p_1^i > p_2^i$  for  $i = 1, 2, 3, 4$
2. If  $i < j$ , then  $p_1^i > p_1^j$
3. If  $i < j$ , then  $p_2^i < p_2^j$

**A1: Consider a 4-taxon star tree with branch length  $0 < t_1 \leq t_2 \leq t_3 \leq t_4 < \infty$ . The probability of the site pattern  $xxxy$  is greater than the probability of the site pattern  $xyyy$ , i.e.,  $P(xxxy) + P(xxyx) + P(xyxx) + P(yxxx) > P(xxyy) + P(xyyx) + P(xyxy)$ .**

Proof: There are 12 combinations of 4 nucleotides that fit the site patterns  $xxxy, xxyx, xyxx, yxxx, xxyy, xyyx, xyxy$  respectively. Also, the 12 combinations for the site pattern  $xxxy$  (or the other site patterns) have the same probability. Thus, it is sufficient to show that  $P(AAAC) + P(AAAC) + P(AACA) + P(ACAA) + P(CAAA) > (P(AACC) + P(ACAC) + P(ACCA))$ . We first find the probability of the site patterns with three identical characters,

$$\begin{aligned}
& P(AAAC) + P(AACA) + P(ACAA) + P(CAAA) \\
&= \frac{1}{4} (P_{AA}(t_1)P_{AA}(t_2)P_{AA}(t_3)P_{AC}(t_4) + P_{CA}(t_1)P_{CA}(t_2)P_{CA}(t_3)P_{CC}(t_4) \\
&+ P_{GA}(t_1)P_{GA}(t_2)P_{GA}(t_3)P_{GC}(t_4) + P_{TA}(t_1)P_{TA}(t_2)P_{TA}(t_3)P_{TC}(t_4) \\
&+ P_{AA}(t_1)P_{AA}(t_2)P_{AC}(t_3)P_{AA}(t_4) + P_{CA}(t_1)P_{CA}(t_2)P_{CC}(t_3)P_{CA}(t_4) \\
&+ P_{GA}(t_1)P_{GA}(t_2)P_{GC}(t_3)P_{GA}(t_4) + P_{TA}(t_1)P_{TA}(t_2)P_{TC}(t_3)P_{TA}(t_4)) \\
&= \frac{1}{4} (p_1^1 p_1^2 p_1^3 p_2^4 + p_1^1 p_1^2 p_2^3 p_1^4 + p_1^1 p_2^2 p_1^3 p_1^4 + p_2^1 p_1^2 p_1^3 p_1^4 + p_1^1 p_2^2 p_2^3 p_2^4 + p_2^1 p_1^2 p_2^3 p_2^4 \\
&+ p_2^1 p_2^2 p_1^3 p_2^4 + p_2^1 p_2^2 p_2^3 p_1^4 + 8p_2^1 p_2^2 p_2^3 p_2^4) (1)
\end{aligned}$$

and

$$\begin{aligned}
& P(AACC) + P(ACAC) + P(ACCA) \\
&= \frac{1}{4} (P_{AA}(t_1)P_{AA}(t_2)P_{AC}(t_3)P_{AC}(t_4) + P_{CA}(t_1)P_{CA}(t_2)P_{CC}(t_3)P_{CC}(t_4) \\
&+ P_{GA}(t_1)P_{GA}(t_2)P_{GC}(t_3)P_{GC}(t_4) + P_{TA}(t_1)P_{TA}(t_2)P_{TC}(t_3)P_{TC}(t_4)) \\
&= \frac{1}{4} (p_1^1 p_1^2 p_2^3 p_2^4 + p_1^1 p_2^2 p_1^3 p_2^4 + p_1^1 p_2^2 p_2^3 p_1^4 + p_2^1 p_1^2 p_1^3 p_2^4 + p_2^1 p_1^2 p_2^3 p_1^4 + p_2^1 p_2^2 p_1^3 p_1^4 \\
&+ 6p_2^1 p_2^2 p_2^3 p_2^4) (2)
\end{aligned}$$

Note that we have

$$p_1^1 p_1^2 p_1^3 p_2^4 + p_1^1 p_2^2 p_2^3 p_2^4 - (p_1^1 p_1^2 p_2^3 p_2^4 + p_1^1 p_2^2 p_1^3 p_2^4) = p_1^1 p_2^4 (p_1^2 - p_2^2)(p_1^3 - p_2^3) > 0$$

$$p_1^1 p_1^2 p_2^3 p_1^4 + p_2^1 p_2^2 p_2^3 p_1^4 - (p_2^1 p_1^2 p_2^3 p_1^4 + p_1^1 p_2^2 p_2^3 p_1^4) = p_2^3 p_1^4 (p_1^1 - p_2^1)(p_1^2 - p_2^2) > 0$$

$$p_2^1 p_1^2 p_1^3 p_1^4 + p_2^1 p_2^2 p_1^3 p_2^4 - (p_2^1 p_1^2 p_1^3 p_2^4 + p_2^1 p_2^2 p_1^3 p_1^4) = p_2^1 p_1^3 (p_1^2 - p_2^2)(p_1^4 - p_2^4) > 0$$

Thus,

$$\begin{aligned}
& P(AAAC) + P(AACA) + P(ACAA) + P(CAAA) - (P(AACC) + P(ACAC) + P(ACCA)) \\
&= \frac{1}{4} (p_1^1 p_1^2 p_1^3 p_2^4 + p_1^1 p_1^2 p_2^3 p_1^4 + p_1^1 p_2^2 p_1^3 p_1^4 + p_2^1 p_1^2 p_1^3 p_1^4 + p_1^1 p_2^2 p_2^3 p_2^4 + p_2^1 p_1^2 p_2^3 p_2^4 \\
&+ p_2^1 p_2^2 p_1^3 p_2^4 + p_2^1 p_2^2 p_2^3 p_1^4 + 8p_2^1 p_2^2 p_2^3 p_2^4) \\
&- \frac{1}{4} (p_1^1 p_1^2 p_2^3 p_2^4 + p_1^1 p_2^2 p_1^3 p_2^4 + p_1^1 p_2^2 p_2^3 p_1^4 + p_2^1 p_1^2 p_1^3 p_2^4 + p_2^1 p_1^2 p_2^3 p_1^4 + p_2^1 p_2^2 p_1^3 p_1^4 \\
&+ 6p_2^1 p_2^2 p_2^3 p_2^4) > 0
\end{aligned}$$

■

**A2: Consider a 4-taxon star tree with branch length  $t_1, t_2 < t_3, t_4$ . Then,  $P(xxyy) >$**

**$P(xyyx)$  and  $P(xxyy) > P(xyxy)$ .**

Proof: There are 12 combinations of 4 nucleotides that fit the site patterns  $xxyy, xyyx, xyxy$ .

The 12 combinations have the same probability under the Jukes-Cantor substitution model.

Hence, it suffices to show that  $P(AACC) > P(ACAC)$  and  $P(AACC) > P(ACCA)$ .

$$\begin{aligned}
P(AACC) &= P_{AA}(t_1)P_{AA}(t_2)P_{AC}(t_3)P_{AC}(t_4) + P_{CA}(t_1)P_{CA}(t_2)P_{CC}(t_3)P_{CC}(t_4) \\
&+ P_{GA}(t_1)P_{GA}(t_2)P_{GC}(t_3)P_{GC}(t_4) + P_{TA}(t_1)P_{TA}(t_2)P_{TC}(t_3)P_{TC}(t_4) \\
&= P_1^1 P_1^2 P_2^3 P_2^4 + P_2^1 P_2^2 P_1^3 P_1^4 + 2P_2^1 P_2^2 P_2^3 P_2^4
\end{aligned}$$

$$\begin{aligned}
P(ACAC) &= P_{AA}(t_1)P_{AC}(t_2)P_{AA}(t_3)P_{AC}(t_4) + P_{CA}(t_1)P_{CC}(t_2)P_{CA}(t_3)P_{CC}(t_4) \\
&+ P_{GA}(t_1)P_{GC}(t_2)P_{GA}(t_3)P_{GC}(t_4) + P_{TA}(t_1)P_{TC}(t_2)P_{TA}(t_3)P_{TC}(t_4) \\
&= P_1^1 P_2^2 P_1^3 P_2^4 + P_2^1 P_1^2 P_2^3 P_1^4 + 2P_2^1 P_2^2 P_2^3 P_2^4
\end{aligned}$$

$$\begin{aligned}
P(ACCA) &= P_{AA}(t_1)P_{AC}(t_2)P_{AC}(t_3)P_{AA}(t_4) + P_{CA}(t_1)P_{CC}(t_2)P_{CC}(t_3)P_{CA}(t_4) \\
&+ P_{GA}(t_1)P_{GC}(t_2)P_{GC}(t_3)P_{GA}(t_4) + P_{TA}(t_1)P_{TC}(t_2)P_{TC}(t_3)P_{TA}(t_4) \\
&= P_1^1 P_2^2 P_2^3 P_1^4 + P_2^1 P_1^2 P_1^3 P_2^4 + 2P_2^1 P_2^2 P_2^3 P_2^4
\end{aligned}$$

Thus,  $P(AACC) - P(ACAC) = P_1^1 P_1^2 P_2^3 P_2^4 + P_2^1 P_2^2 P_1^3 P_1^4 + 2P_2^1 P_2^2 P_2^3 P_2^4 - P_1^1 P_2^2 P_1^3 P_2^4 -$

$P_2^1 P_1^2 P_2^3 P_1^4 - 2P_2^1 P_2^2 P_2^3 P_2^4 > P_2^1 P_1^2 P_2^3 P_1^4 + P_2^1 P_2^2 P_1^3 P_1^4 - P_2^1 P_2^2 P_1^3 P_1^4 - P_2^1 P_1^2 P_2^3 P_1^4 = 0$ , and

$$\begin{aligned}
P(AACC) - P(ACCA) &= P_1^1 P_1^2 P_2^3 P_2^4 + P_2^1 P_2^2 P_1^3 P_1^4 + 2P_2^1 P_2^2 P_2^3 P_2^4 - P_1^1 P_2^2 P_2^3 P_1^4 - P_2^1 P_1^2 P_1^3 P_2^4 - \\
2P_2^1 P_2^2 P_2^3 P_2^4 &> P_2^1 P_1^2 P_1^3 P_2^4 + P_2^1 P_2^2 P_1^3 P_1^4 - P_2^1 P_2^2 P_1^3 P_1^4 - P_2^1 P_1^2 P_1^3 P_2^4 = 0
\end{aligned}$$

■

**A3: If the nucleotides at two internal nodes of a bifurcating 4-taxon tree are distinct, the probability of the site pattern  $xxyy$  is greater than the probability of the site pattern  $xyxy$ , i.e.,  $P(xxyy) > P(xyxy)$ . Similarly,  $P(xxyy) > P(xyyx)$ .**

Proof: There are 12 combinations of 4 nucleotides that fit the site pattern  $xxyy$ . Similarly, there are 12 combinations for the site pattern  $xyxy$ . The 12 combinations have the same probability under the Jukes-Cantor substitution model. Hence, it suffices to show that the probability of  $AACC$  is greater than the probability of  $ACAC$ . If two nucleotides at the internal nodes are distinct, the probability of  $AACC$  is given by

$$\begin{aligned}
P(AACC) &= P_{AA}(t_1)P_{AA}(t_2)P_{CC}(t_3)P_{CC}(t_4) + P_{AA}(t_1)P_{AA}(t_2)P_{GC}(t_3)P_{GC}(t_4) \\
&\quad + P_{AA}(t_1)P_{AA}(t_2)P_{TC}(t_3)P_{TC}(t_4) + P_{CA}(t_1)P_{CA}(t_2)P_{AC}(t_3)P_{AC}(t_4) \\
&\quad + P_{CA}(t_1)P_{CA}(t_2)P_{GC}(t_3)P_{GC}(t_4) + P_{CA}(t_1)P_{CA}(t_2)P_{TC}(t_3)P_{TC}(t_4) \\
&\quad + P_{GA}(t_1)P_{GA}(t_2)P_{AC}(t_3)P_{AC}(t_4) + P_{GA}(t_1)P_{GA}(t_2)P_{CC}(t_3)P_{CC}(t_4) \\
&\quad + P_{GA}(t_1)P_{GA}(t_2)P_{TC}(t_3)P_{TC}(t_4) + P_{TA}(t_1)P_{TA}(t_2)P_{AC}(t_3)P_{AC}(t_4) \\
&\quad + P_{TA}(t_1)P_{TA}(t_2)P_{CC}(t_3)P_{CC}(t_4) + P_{TA}(t_1)P_{TA}(t_2)P_{GC}(t_3)P_{GC}(t_4) \\
&= P_1^1 P_1^2 P_1^3 P_1^4 + 2P_1^1 P_1^2 P_2^3 P_2^4 + 7P_2^1 P_2^2 P_2^3 P_2^4 + 2P_2^1 P_2^2 P_1^3 P_1^4
\end{aligned}$$

The probability of  $ACAC$  is given by

$$\begin{aligned}
P(ACAC) &= P_{AA}(t_1)P_{AC}(t_2)P_{CA}(t_3)P_{CC}(t_4) + P_{AA}(t_1)P_{AC}(t_2)P_{GA}(t_3)P_{GC}(t_4) \\
&\quad + P_{AA}(t_1)P_{AC}(t_2)P_{TA}(t_3)P_{TC}(t_4) + P_{CA}(t_1)P_{CC}(t_2)P_{AA}(t_3)P_{AC}(t_4) \\
&\quad + P_{CA}(t_1)P_{CC}(t_2)P_{GA}(t_3)P_{GC}(t_4) + P_{CA}(t_1)P_{CC}(t_2)P_{TA}(t_3)P_{TC}(t_4) \\
&\quad + P_{GA}(t_1)P_{GC}(t_2)P_{AA}(t_3)P_{AC}(t_4) + P_{GA}(t_1)P_{GC}(t_2)P_{CA}(t_3)P_{CC}(t_4) \\
&\quad + P_{GA}(t_1)P_{GC}(t_2)P_{TA}(t_3)P_{TC}(t_4) + P_{TA}(t_1)P_{TC}(t_2)P_{AA}(t_3)P_{AC}(t_4) \\
&\quad + P_{TA}(t_1)P_{TC}(t_2)P_{CA}(t_3)P_{CC}(t_4) + P_{TA}(t_1)P_{TC}(t_2)P_{GA}(t_3)P_{GC}(t_4) \\
&= P_1^1 P_2^2 P_2^3 P_1^4 + 2P_1^1 P_2^2 P_2^3 P_2^4 + 2P_2^1 P_2^2 P_2^3 P_2^4 + 3P_2^1 P_2^2 P_1^3 P_2^4 + 2P_2^1 P_2^2 P_1^3 P_2^4 \\
&\quad + 2P_2^1 P_2^2 P_2^3 P_1^4
\end{aligned}$$

The probability of *ACCA* is given by

$$\begin{aligned}
P(ACCA) &= P_{AA}(t_1)P_{AC}(t_2)P_{CC}(t_3)P_{CA}(t_4) + P_{AA}(t_1)P_{AC}(t_2)P_{GC}(t_3)P_{GA}(t_4) \\
&\quad + P_{AA}(t_1)P_{AC}(t_2)P_{TC}(t_3)P_{TA}(t_4) + P_{CA}(t_1)P_{CC}(t_2)P_{AC}(t_3)P_{AA}(t_4) \\
&\quad + P_{CA}(t_1)P_{CC}(t_2)P_{GC}(t_3)P_{GA}(t_4) + P_{CA}(t_1)P_{CC}(t_2)P_{TC}(t_3)P_{TA}(t_4) \\
&\quad + P_{GA}(t_1)P_{GC}(t_2)P_{AC}(t_3)P_{AA}(t_4) + P_{GA}(t_1)P_{GC}(t_2)P_{CC}(t_3)P_{CA}(t_4) \\
&\quad + P_{GA}(t_1)P_{GC}(t_2)P_{TC}(t_3)P_{TA}(t_4) + P_{TA}(t_1)P_{TC}(t_2)P_{AC}(t_3)P_{AA}(t_4) \\
&\quad + P_{TA}(t_1)P_{TC}(t_2)P_{CC}(t_3)P_{CA}(t_4) + P_{TA}(t_1)P_{TC}(t_2)P_{GC}(t_3)P_{GA}(t_4) \\
&= P_1^1 P_2^2 P_1^3 P_2^4 + P_2^1 P_1^2 P_2^3 P_1^4 + 2P_1^1 P_2^2 P_2^3 P_2^4 + 2P_2^1 P_2^2 P_2^3 P_2^4 + 2P_2^1 P_2^2 P_1^3 P_2^4 \\
&\quad + 2P_2^1 P_1^2 P_2^3 P_2^4 + 2P_2^1 P_2^2 P_2^3 P_1^4
\end{aligned}$$

We first show that  $P(AACC) > P(ACAC)$ . Observe that

$$P_2^1 P_2^2 P_1^3 P_1^4 + P_2^1 P_2^2 P_2^3 P_2^4 - P_2^1 P_2^2 P_2^3 P_1^4 - P_2^1 P_2^2 P_1^3 P_2^4 = P_2^1 P_2^2 (P_1^3 - P_2^3)(P_1^4 - P_2^4) > 0$$

and

$$P_1^1 P_1^2 P_2^3 P_2^4 + P_2^1 P_2^2 P_2^3 P_2^4 - P_1^1 P_2^2 P_2^3 P_2^4 - P_2^1 P_1^2 P_2^3 P_2^4 = P_2^3 P_2^4 (P_1^1 - P_2^1)(P_1^2 - P_2^2) > 0$$

and

$$\begin{aligned}
& P_1^1 P_1^2 P_1^3 P_1^4 + P_2^1 P_2^2 P_2^3 P_2^4 - P_1^1 P_2^2 P_2^3 P_1^4 - P_2^1 P_2^2 P_1^3 P_2^4 \\
& > P_2^1 P_1^2 P_1^3 P_2^4 + P_2^1 P_2^2 P_2^3 P_2^4 - P_2^1 P_2^2 P_2^3 P_2^4 - P_2^1 P_2^2 P_1^3 P_2^4 > 0
\end{aligned}$$

and

$$P_1^1 P_1^2 P_1^3 P_1^4 + P_2^1 P_2^2 P_2^3 P_2^4 - P_1^1 P_2^2 P_1^3 P_2^4 - P_2^1 P_1^2 P_2^3 P_1^4 = (P_1^1 P_1^3 - P_2^1 P_2^3)(P_1^2 P_1^4 - P_2^2 P_2^4) > 0$$

Thus,

$$\begin{aligned}
P(AACC) &= P_1^1 P_1^2 P_1^3 P_1^4 + 2P_1^1 P_1^2 P_2^3 P_2^4 + 7P_2^1 P_2^2 P_2^3 P_2^4 + 2P_2^1 P_2^2 P_1^3 P_1^4 \\
&> P_1^1 P_2^2 P_2^3 P_1^4 + 2P_1^1 P_2^2 P_2^3 P_2^4 + 2P_2^1 P_2^2 P_2^3 P_2^4 + 3P_2^1 P_2^2 P_1^3 P_2^4 + 2P_2^1 P_1^2 P_2^3 P_2^4 \\
&+ 2P_2^1 P_2^2 P_2^3 P_1^4 = P(ACAC)
\end{aligned}$$

and

$$\begin{aligned}
P(AACC) &= P_1^1 P_1^2 P_1^3 P_1^4 + 2P_1^1 P_1^2 P_2^3 P_2^4 + 7P_2^1 P_2^2 P_2^3 P_2^4 + 2P_2^1 P_2^2 P_1^3 P_1^4 \\
&> P_1^1 P_2^2 P_1^3 P_2^4 + P_2^1 P_1^2 P_2^3 P_1^4 + 2P_1^1 P_2^2 P_2^3 P_2^4 + 2P_2^1 P_2^2 P_2^3 P_2^4 + 2P_2^1 P_2^2 P_1^3 P_2^4 \\
&+ 2P_2^1 P_1^2 P_2^3 P_2^4 + 2P_2^1 P_2^2 P_2^3 P_1^4 = P(ACCA)
\end{aligned}$$

We have shown that  $P(AACC) > P(ACAC)$  and  $(AACC) > P(ACCA)$ . It follows that

$$P(xxyy) = 12P(AACC) > 12P(ACAC) = P(xyxy) \text{ and } P(xxyy) = 12P(AACC) >$$

$$12P(ACCA) = P(xyyx). \text{ Note that the inequalities } P(xxyy) > P(xyxy) \text{ and } P(xxyy) >$$

$$P(xyyx) \text{ do not depend on the order of branch lengths } t_1, t_2, t_3, t_4. \text{ Thus, } P(xxyy) > P(xyxy)$$

$$\text{and } P(xxyy) > P(xyyx) \text{ for all bifurcating 4-taxon trees.}$$

■
